# Supplementary material
Source: PubMed Central journal article supplement (PMC6352505)
Supplement: Supp_Figure2.pdf [file Supp_Figure2.pdf]

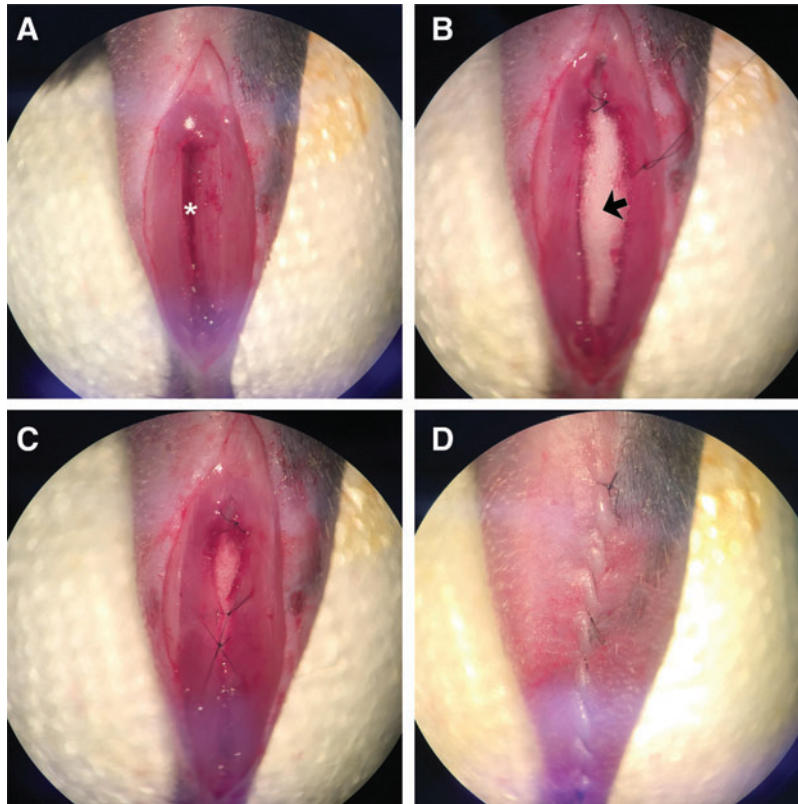

**SUPPLEMENTARY FIG. S2.** Implantation of mmRNA-releasing scaffolds into a volumetric muscle loss injury model. (A) The tibialis anterior muscle is shown with 20% muscle ablation (denoted by \*). (B) Afterwards, the scaffold is implanted (*arrow*) between two segments of the muscle. (C) The muscle is sutured closed. (D) Afterwards, the skin is sutured closed.
