# Supplementary material
Source: PubMed Central journal article supplement (PMC6352505)
Supplement: Supp_Figure3.pdf [file Supp_Figure3.pdf]

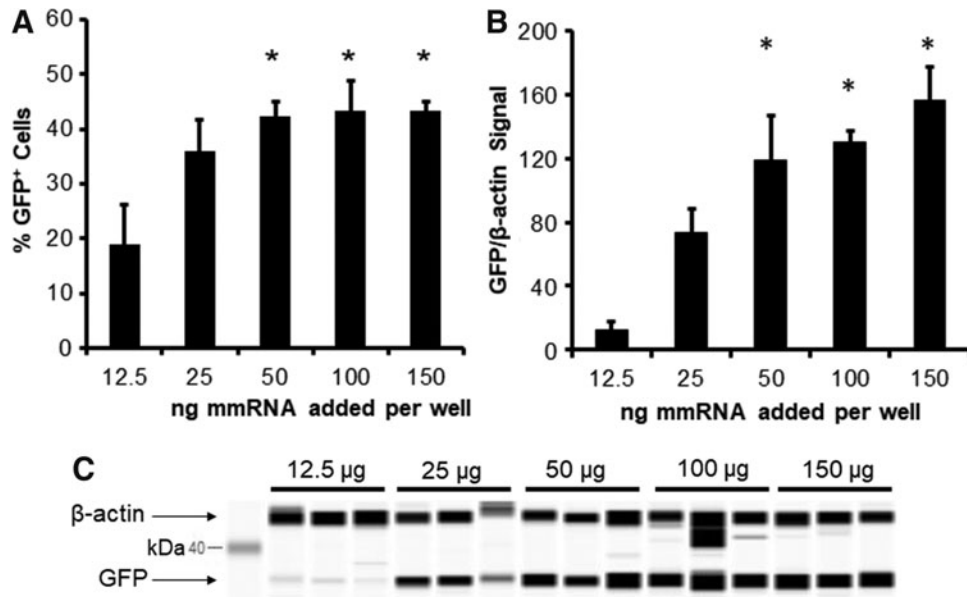

**SUPPLEMENTARY FIG. S3.** Correlation between transfection efficiencies of GFP mmRNA quantified by percentage of GFP-positive cells and immunoblotting. **(A)** Human fibroblasts were seeded into two 96-wells plates and transfected on the next day with indicated amount of RNA. At day 1 after transfection with GFP mmRNA, cells on plate 1 were fixed and GFP-positive cells were counted as described in Fig. 2A. **(B, C)** Cells on plate 2 were analyzed by immunoblotting with GFP antibody ( $n=3$ ). Mean  $\pm$  SD of GFP expression **(B)**, based on GFP band intensity normalized to that of  $\beta$ -actin **(C)**. \*Statistically significant relationship, compared to 12.5 ng loading condition. GFP, green fluorescence protein.
