# Supplementary material
Source: PubMed Central journal article supplement (PMC6352505)
Supplement: Supp_Figure4.pdf [file Supp_Figure4.pdf]

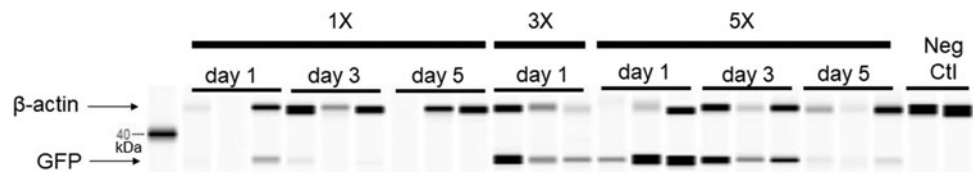

**SUPPLEMENTARY FIG. S4.** Immunoblots of GFP expression from transfected fibroblasts on GFP mmRNA-releasing scaffolds. GFP expression results from Figure 3C and D were based on GFP band intensity normalized to that of  $\beta$ -actin ( $n=3$ ).
