# Supplementary material
Source: PubMed Central journal article supplement (PMC6352505)
Supplement: Supp_Figure5.pdf [file Supp_Figure5.pdf]

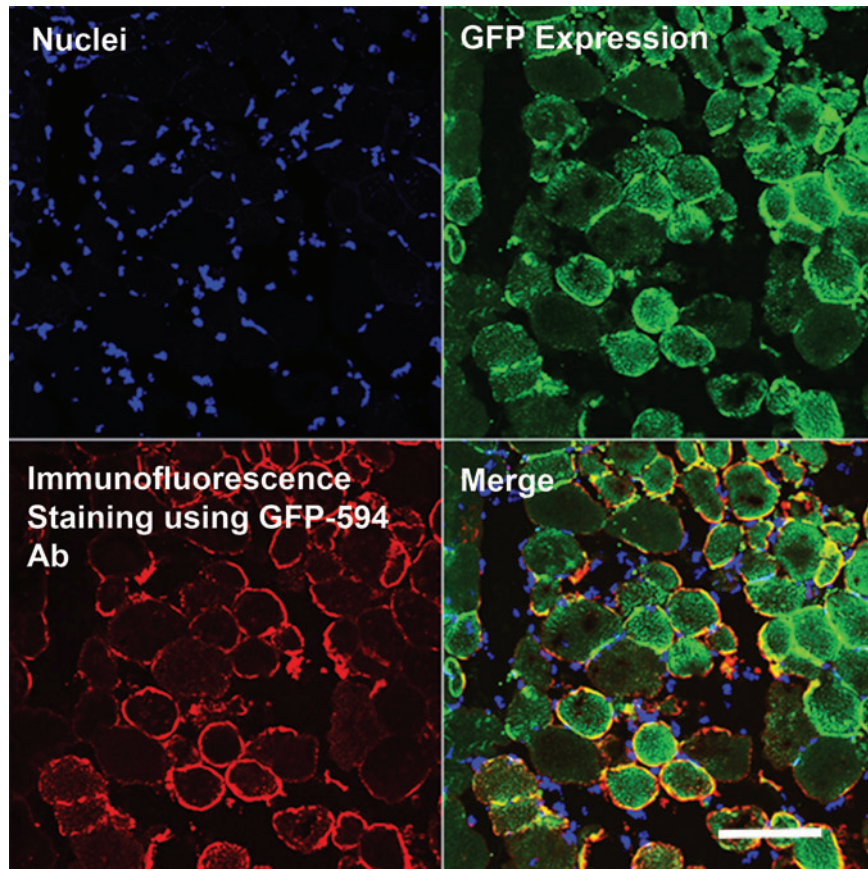

**SUPPLEMENTARY FIG. S5.** Fluorescence detection of GFP expression in murine tibialis anterior muscle 1 day after implantation with GFP mmRNA-releasing scaffold. Confocal images depict fluorescence detection of GFP expression (*green*). In addition, immunofluorescence staining depicts fluorescence staining after incubation with a GFP antibody directly conjugated to Alexa Fluor 594 (*red*). Scale bar: 100  $\mu\text{m}$ .
