# Supplementary material
Source: PubMed Central journal article supplement (PMC6352505)
Supplement: Supp_Figure6.pdf [file Supp_Figure6.pdf]

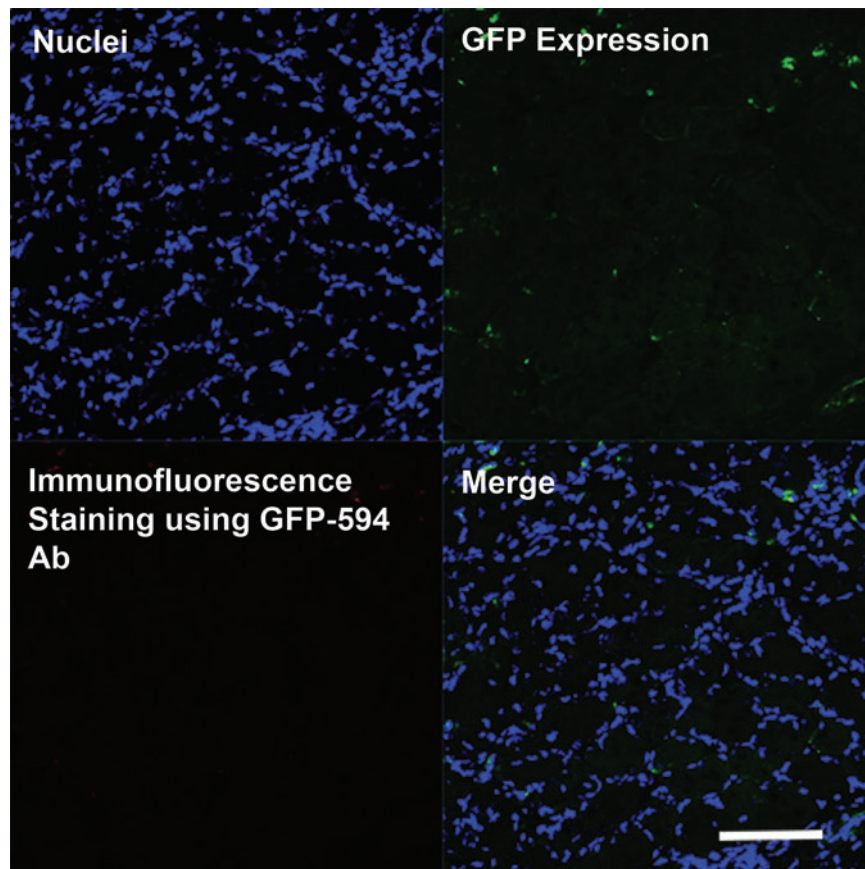

**SUPPLEMENTARY FIG. S6.** Negative control sample for fluorescence detection of GFP. Muscle tissue without GFP mmRNA-releasing scaffold was selected as negative control sample. Immunofluorescence staining depicts fluorescence staining after incubation with a GFP antibody directly conjugated to Alexa Fluor 594. Scale bar: 100  $\mu\text{m}$ .
