# Supplementary material
Source: PubMed Central journal article supplement (PMC6352505)
Supplement: Supp_Table1.pdf [file Supp_Table1.pdf]

SUPPLEMENTARY TABLE S1. ENDOGENOUS HEPATOCYTE GROWTH FACTOR SECRETION BY FIBROBLASTS

| HGF,<br>pg/ml | Sample collection day |               |               |           |               |
|---------------|-----------------------|---------------|---------------|-----------|---------------|
|               | 1                     | 3             | 5             | 12        | 15            |
| M ± SD        | 183.9 ± 80.7          | 342.8 ± 136.8 | 382.0 ± 198.1 | 155.3 ± 0 | 172.5 ± 110.3 |

HGF concentration in media from fibroblasts cultured on control (not HGF-mmRNA loaded) scaffold was quantified by HGF ELISA ( $n=1-3$ ); \*one media sample was measured per time point. HGF, hepatocyte growth factor.
